# Supplementary material
Source: Springer Nature journal article supplement (https://www.springermedizin.de/resource/supplementary/13075_2012_3855_MOESM3_ESM.pdf/9695482)

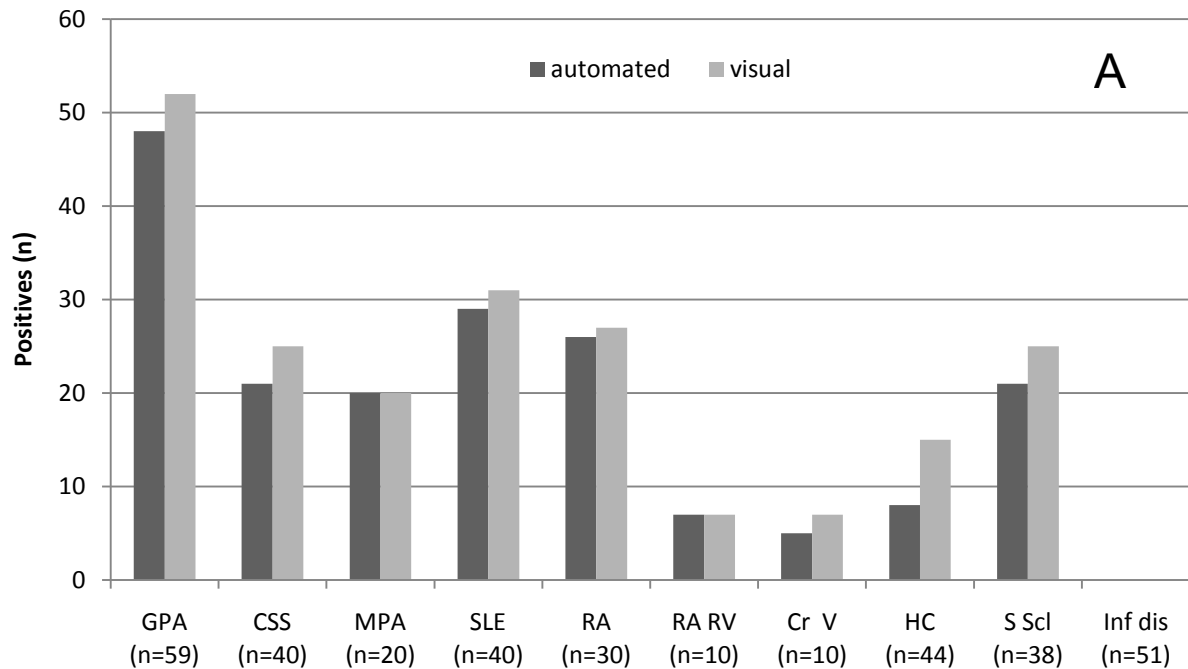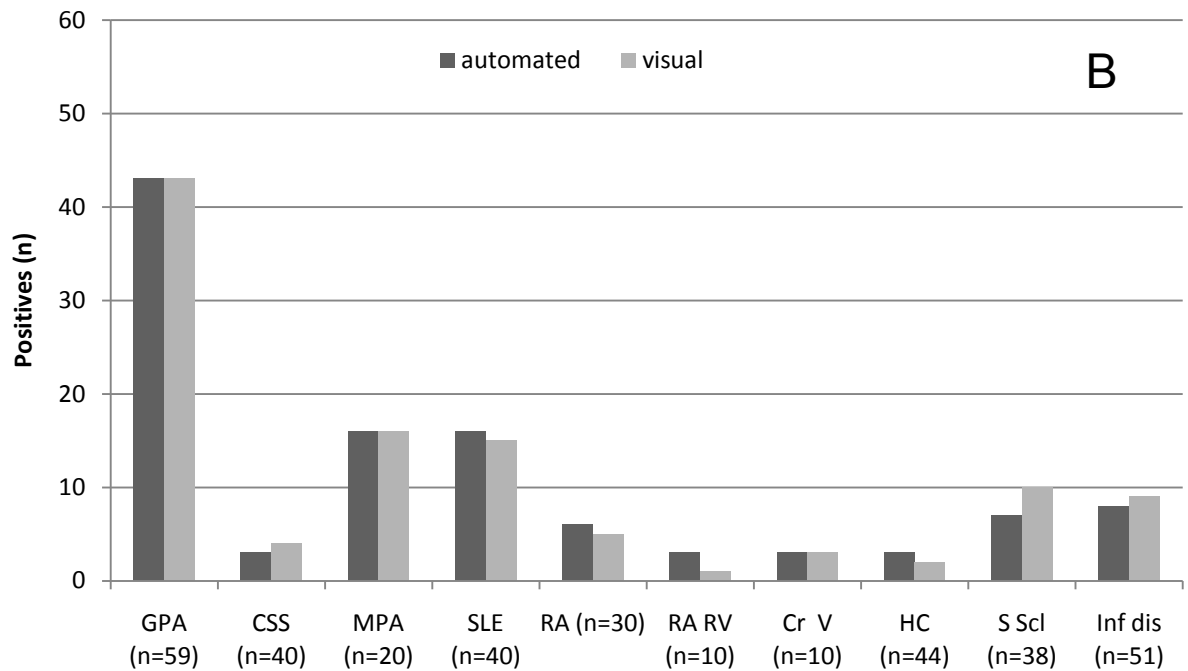

Supplement: MOESM3 [file 9695482]
